# Supplementary material for: Comparison of Carbonic Anhydrases for CO2 Sequestration
Source: MDPI journal article supplement (doi:10.3390/ijms23020957), 2022-01-16
Supplement: s1 [file s1]

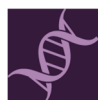

Article

# Comparison of Carbonic Anhydrases for CO<sub>2</sub> Sequestration

Franziska Steger <sup>1</sup>, Johanna Reich <sup>1,2</sup>, Werner Fuchs <sup>1</sup>, Simon K.-M. R. Rittmann <sup>3</sup>, Georg M. Gubits <sup>1</sup>,  
Doris Ribitsch <sup>2,\*</sup> and Günther Bochmann <sup>1</sup>

<sup>1</sup> Institute of Environmental Biotechnology, Department for Agrobiotechnology, University of Natural Resources and Life Sciences Vienna, Konrad Lorenz Str. 20, A-3430 Tulln, Austria; franziska.steger@boku.ac.at (F.S.); johanna.reich@boku.ac.at (J.R.); werner.fuchs@boku.ac.at (W.F.); guebitz@boku.ac.at (G.M.G.); guenther.bochmann@boku.ac.at (G.B.)

<sup>2</sup> ACIB — Austrian Centre of Industrial Biotechnology, Krenngasse 37, 8010 Graz, Austria

<sup>3</sup> Archaea Physiology & Biotechnology Group, Department of Functional and Evolutionary Ecology, University of Vienna, Djerassiplatz 1, 1030 Vienna, Austria; simon.rittmann@univie.ac.at

\* Correspondence: doris.ribitsch@boku.ac.at

## 1. Original SDS-PAGE of CAs in Cleared Cell Lysate and After Purification

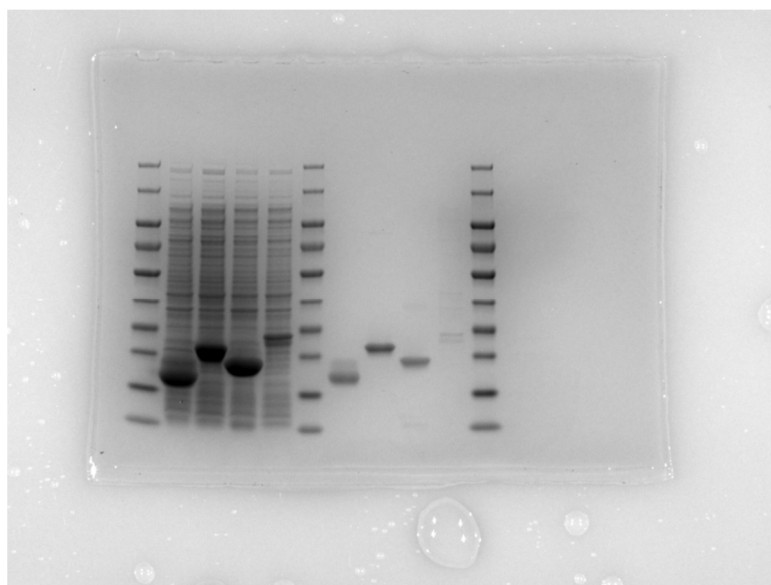

**Figure S1.** original SDS-PAGE of CAs expressed in *E. coli*. Samples of cleared cell lysate and after purification by affinity chromatography.

## 2. SDS-PAGEs of Timepoints During Expression and Purification of CAs

### 2.1. *AwCA*

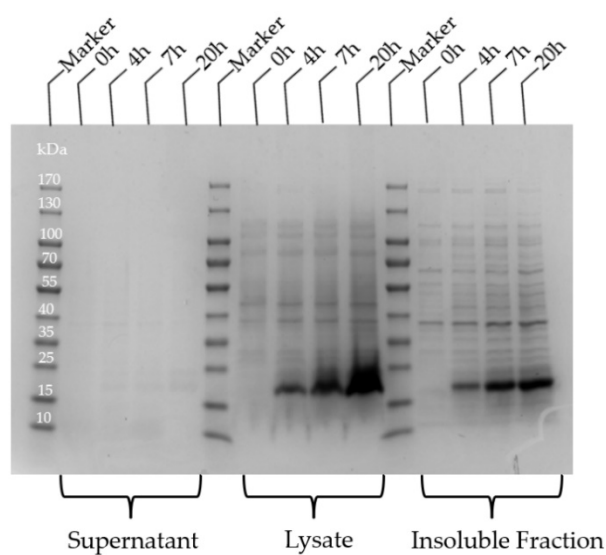

**Figure S2.** SDS-PAGE of supernatant, lysate and insoluble fraction during expression of AwCA in *E. coli*. Expected molecular weight is 22.0 kDa (AwCA).

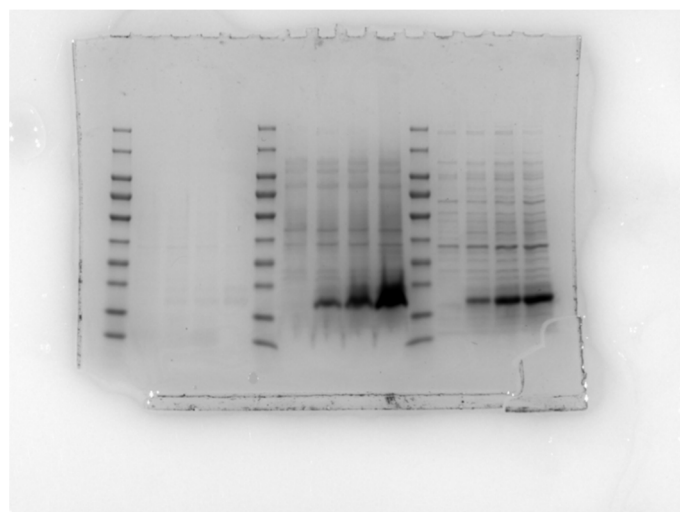

**Figure S3.** original SDS-PAGE of supernatant, lysate and insoluble fraction during expression of AwCA in *E. coli*.

- 1) Marker
- 2) Lysate
- 3) Flowthrough
- 4) Flowthrough
- 5-14) Elution

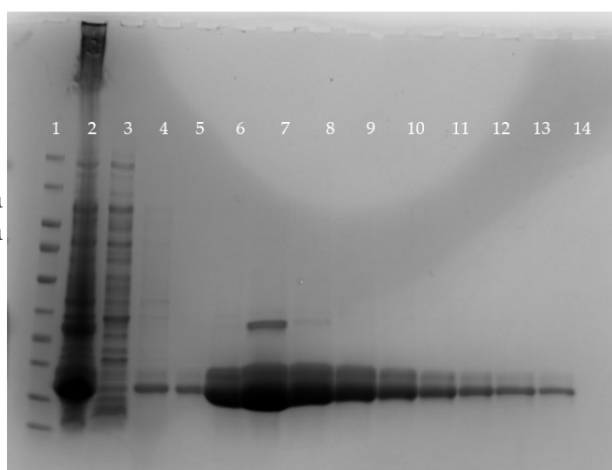

**Figure S4.** SDS-PAGE of lysate (2), flowthrough (3&4) and elution fractions (5-14) during purification of AwCA by affinity chromatography.

## 2.2. PmCA

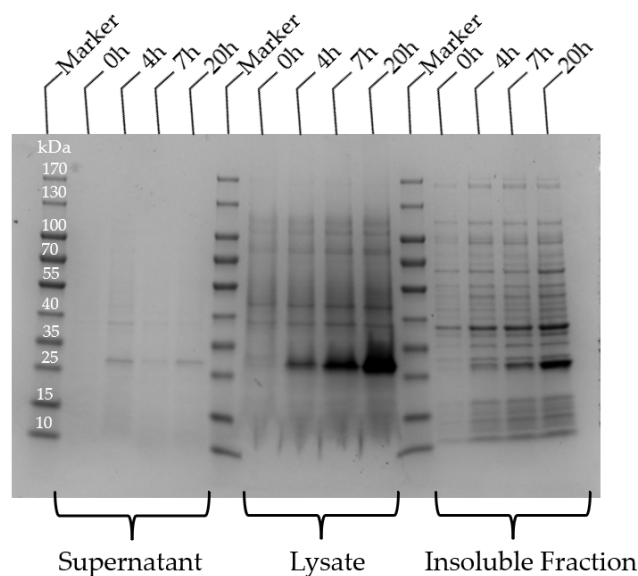

**Figure S5.** SDS-PAGE of supernatant, lysate and insoluble fraction during expression of PmCA in *E. coli*. Expected molecular weight is 26.9 kDa (PmCA).

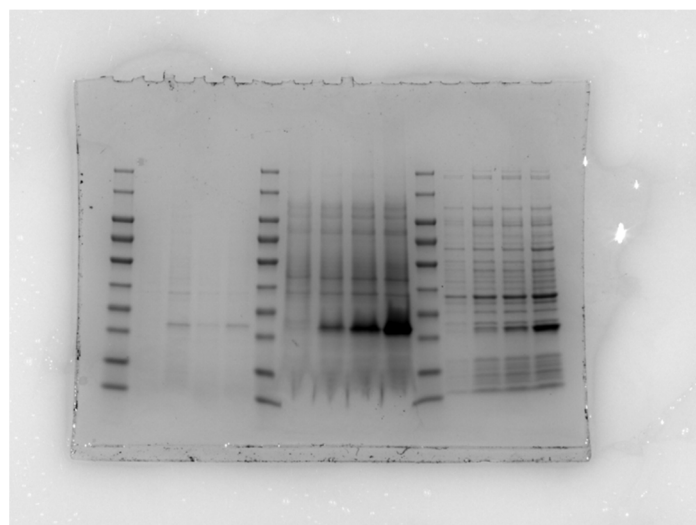

**Figure S6.** original SDS-PAGE of supernatant, lysate and insoluble fraction during expression of PmCA in *E. coli*.

- 1) Marker
- 2) Lysate
- 3) Flowthrough
- 4-13) Elution

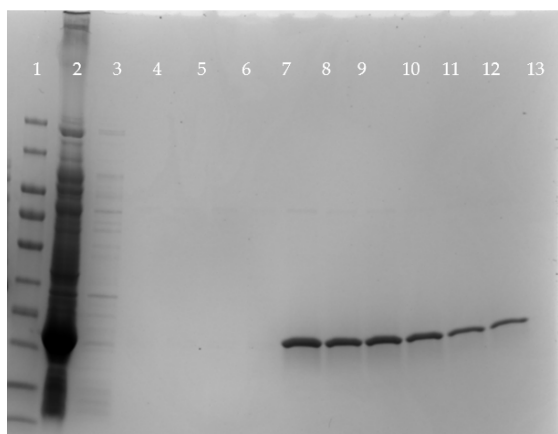

**Figure S7.** SDS-PAGE of lysate (2), flow through (3) and elution fractions (4-13) during purification of PmCA by affinity chromatography.

### 2.3. MtaCA

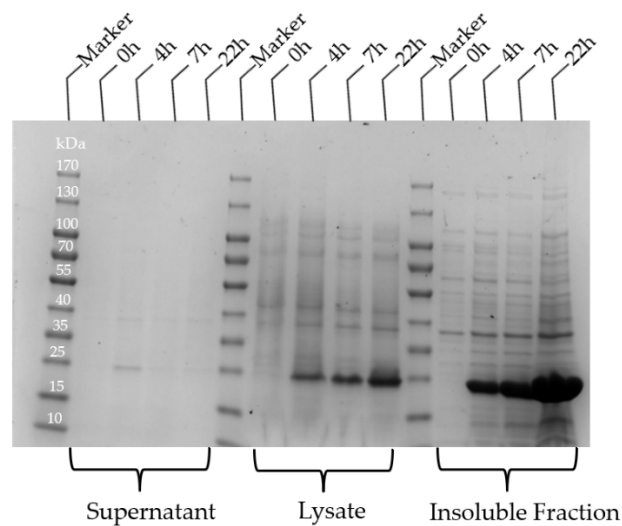

**Figure S8.** SDS-PAGE of supernatant, lysate and insoluble fraction during expression of MtaCA in *E. coli*. Expected molecular weight is 19.9 kDa (MtCA).

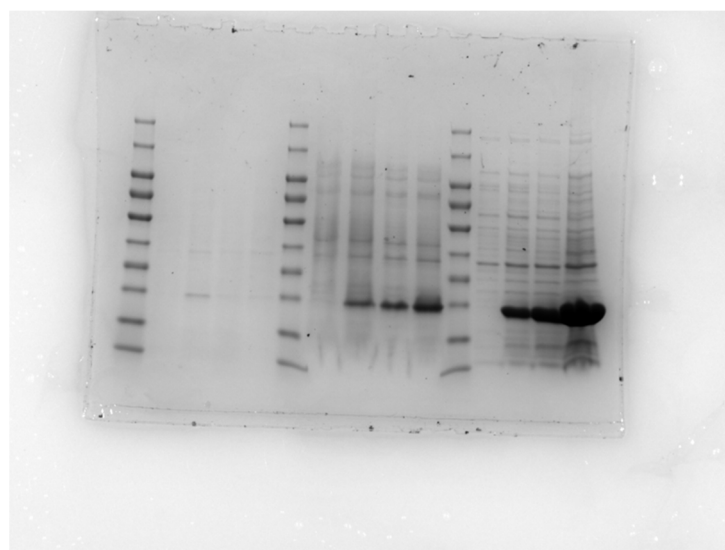

**Figure S9.** original SDS-PAGE of supernatant, lysate and insoluble fraction during expression of MtaCA in *E. coli*.

- 1) Marker
- 2) Lysate
- 3) Flowthrough
- 4-13) Elution

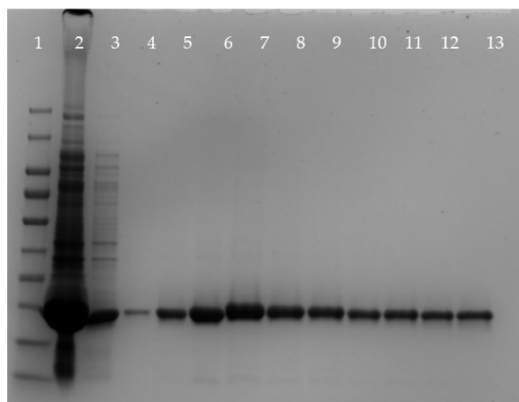

**Figure S10.** SDS-PAGE of lysate (2), flow through (3) and elution fractions (4-13) during purification of MtaCA by affinity chromatography.

#### 2.4. SspCA

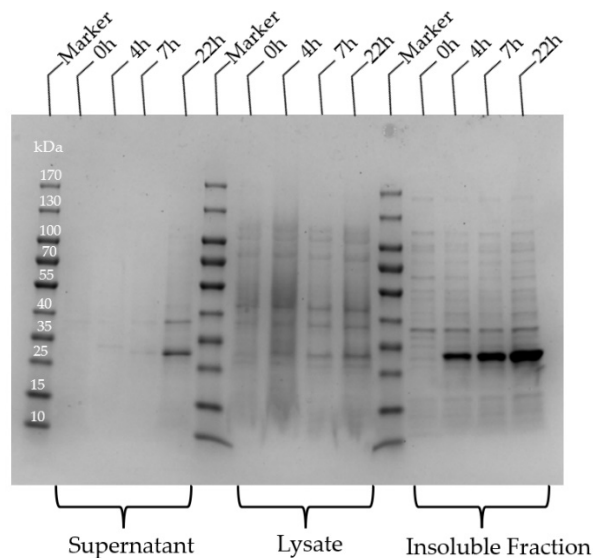

**Figure S11.** SDS-PAGE of supernatant, lysate and insoluble fraction during expression of SspCA in *E. coli*. Expected molecular weight is 27.5 kDa (SspCA).

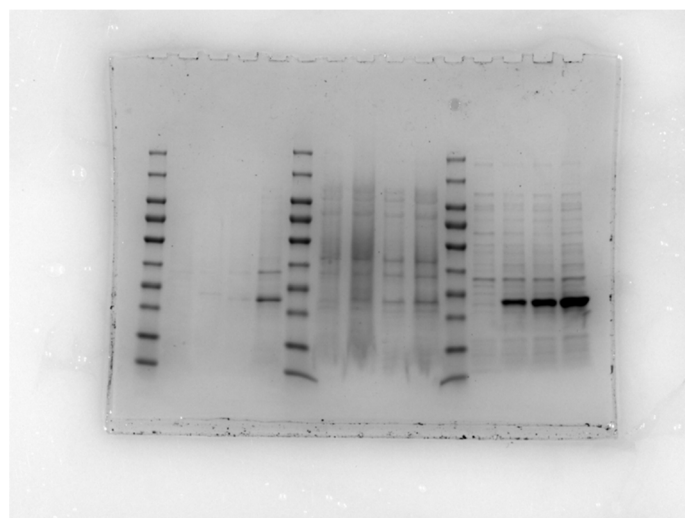

**Figure S12.** original SDS-PAGE of supernatant, lysate and insoluble fraction during expression of SspCA in *E. coli*.

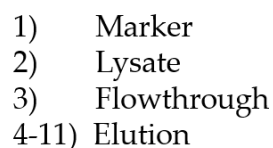

**Figure S13.** SDS-PAGE of lysate (2), flow through (3) and elution fractions (4-11) during purification of SspCA by affinity chromatography.

.....|.....|.....|.....|.....|.....|.....|.....|.....|.....|  
          10               20               30               40               50  
**PmCA**        -----MG GGWSYHGEHG PEHWGDLKDE YIMCKIGKNQ SPVDINR--I  
**SspCA**    MWSHPQFEKE HEWSYEGEKG PEHWAQLKPE FFWCKL-KNQ SPINIDKKYK  
**Consensus**              WSY GE G PEHW LK E CK KNQ SP I

.....|.....|.....|.....|.....|.....|.....|.....|.....|.....|  
          60               70               80               90              100  
**PmCA**    VDAKLKPIKI EYRAG-ATKV LNNGHTIKVS YEPGSYIVVD GIKFELKQFH  
**SspCA**    VKANLPKLNLY YKTAKESV VNNGHTIQIN IKEDNTLNYL GEKYQLKQFH  
**Consensus** V A L Y V NNGHTI G K LKQFH

.....|.....|.....|.....|.....|.....|.....|.....|.....|.....|  
         110              120              130              140              150  
**PmCA**    FHAPSEHKLK GQHYPFEAHF VHADKHGNLA VIGVFFKEGR ENPILEKIWK  
**SspCA**    FHTPSEHTIE KKSYPLEIHf VHKTEDGKIL VVGVMakLGK TNKELDKILN  
**Consensus** FH PSEH YP E HF VH G V GV K G N L KI

.....|.....|.....|.....|.....|.....|.....|.....|.....|.....|  
         160              170              180              190              200  
**PmCA**    VMPENAGEEV KLAHKINAED LLPKDRDYR YSGSLITTPPC SEGVRWIVME  
**SspCA**    VAPAEEGEKI -LDKNLNLNN LIPKDkRYMT YSGSLITTPPC TEGVRWIVLK  
**Consensus** V P GE L N L PKD Y YSGSLITTPPC EGVRWIV

.....|.....|.....|.....|.....|.....|.....|.....|.....|.....|  
         210              220              230              240  
**PmCA**    EEMEMSKEQI EKFRKIMGGD TNRPVQPLNA RMIMEKWShP QFEK  
**SspCA**    KPISISKQQL EKLSVMVNP NNRPVQEINS RWIIIEGF--- ----  
**Consensus** SK Q EK M NRpvQ N R I E

**Figure S14:** ClustalW Multiple Alignment (BioEdit Sequence Alignment Editor v7.0.5) of  $\alpha$ -CAs from *Persephonella marina* (PmCA) and *Sulphurihydrogenibium yellowstonense* (SspCA) as expressed in this study. Orange: StrepTag. Grey background highlights the zinc-coordinating histidines, red background indicates the proton shuttle residues and blue background shows the „gate-keeper” residues of  $\alpha$ -CAs.

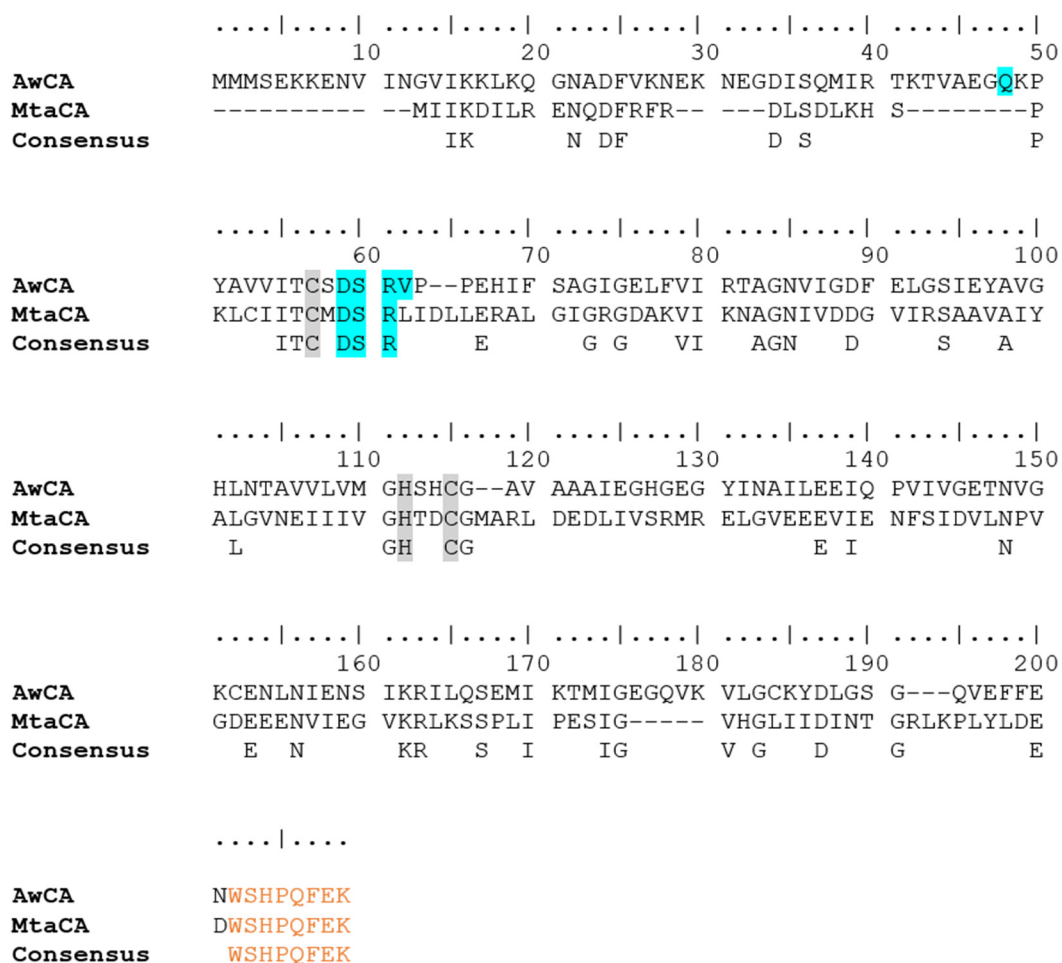

Figure S15: ClustalW Multiple Alignment (BioEdit Sequence Alignment Editor v7.0.5) of  $\beta$ -CAs from *Methanobacterium thermoautotrophicum* (MtaCA) and *Acetobacterium woodii* (AwCA). Orange: StrepTag. Grey background highlights the zinc-coordinating histidines and blue background indicates amino acids which are involved in the catalytic reaction.

#### 4. Codon Optimized CA Gene Sequences

##### AwCA-StrepTag

3'-CATATG

ATGATGAGCGAGAAGAAGGAGAACGTGATCAACGGTGTGATTAAGAAGCTGAAGCAAGGCAACGCGGACTTTGTG  
AAGAACGAGAAAAACGAGGGCGACATCAGCCAGATGATTCGTACCAAGACCGTGGCGGAAGGTCAAAAACCGTAC  
GCGGTGGTTATCACCTGCAGCGATAGCCGTGTTCCGCCGAGCACATCTTCAGCGCGGTATTGGCGAACTGTTT  
GTGATCCGTACCGCGGCAACGTTATTGGTGACTTCGAGCTGGGCAGCATCGAATACGCGGTGGGTACCTGAAC  
ACCGCGGTGGTTCTGGTGATGGGTACAGCCATTGCGGTGCGGTTGCGGCGCGGATTGAGGGTCATGGTGAAGGT  
TATATCAACGCGATTCTGGAGGAAATCCAGCCGGTGATTGTTGGCGAAACCAACGTTGGCAAGTGCGAGAACCTG  
AACATCGAAAACAGCATCAAGCGTATTCTGCAGAGCGAGATGATCAAAACCATGATTGGCGAAGGTCAAGTGAAG  
GTTCTGGGCTGCAAATATGATCTGGGTAGCGGTGAGTTGAGTTCTTTGAAAACCTGGAGCCATCCGCAATTGAA  
AAATAA

AAGCTT-5'

**PmCA-StrepTag**

3`-CATATG

GGCGGCGGTTGGAGCTACACGGCGAGCATGGCCCCGAGCATTGGGGTGACCTGAAGGACGAGTACATTATGTGC  
 AAGATCGGCAAGAACCAGAGCCCCGGTGGACATCAACCGTATTGTTGATGCGAAGCTGAAACCGATCAAGATTGAG  
 TACCGTGCGGGCGCGACCAAAGTGCTGAACAACGGTCACACCATCAAGGTTAGCTACGAACCGGGCAGCTATATC  
 GTGGTTGACGGTATTAAGTTCGAACTGAAACAGTTCCTACTTTCACGCGCCGAGCGAGCACAAGCTGAAAGGCCAA  
 CACTATCCGTTTCGAAGCGCACTTTGTGCACGCGGATAAACACGGTAACCTGGCGGTGATTGGCGTTTTCTTTAAG  
 GAAGGTCGTGAGAACCCGATCCTGGAAAAGATTTGGAAAGTGATGCCGGAACGCGGGCGAGGAAGTTAAGCTG  
 GCGCACAAAATCAACGCGGAGGACCTGCTGCCGAAAGACCGTGATTACTATCGTTATAGCGGCAGCCTGACCACC  
 CCGCCGTGCAGCGAGGGTGTGCGTTGGATTGTTATGGAGGAAGAGATGGAAATGAGCAAGGAACAAATCGAGAAG  
 TTTTCGTAAAATTATGGGTGGCGATACCAACCGTCCGGTTCAACCGCTGAATGCGCGTATGATTATGGAGAAATGG  
 AGCCACCCGCAATTTGAGAAGTAA

AAGCTT-5`

**MtaCA-StrepTag**

3`-CATATG

CATCAAAGACATCCTGCGTGAGAACCAAGATTTCCGTTTCCGTGACCTGAGCGACCTGAAGCATAGCCCGAAGCT  
 GTGCATCATTACCTGCATGGACAGCCGTCTGATCGATCTGCTGGAACGTGCGCTGGGTATTGGCCGTGGTGACGC  
 GAAAGTGATTAAAAACGCGGGCAACATCGTGACGATGGTGTTATTCGTAGCGCGGCGGTTGCGATCTATGCGCT  
 GGGCGTGAACGAGATCATTATCGTTGGCCACACCGATTGCGGTATGGCGCGTCTGGACGAGGATCTGATCGTGAG  
 CCGTATGCGTGAACCTGGGTGTGGAGGAAGAGTTATTGAGAACTTCAGCATCGACGTGCTGAACCCGGTTGGCGA  
 TGAAGAGGAAAACGTGATCGAAGGTGTTAAGCGTCTGAAAAGCAGCCCGCTGATTCCGGAGAGCATCGGCGTTCA  
 CGGTCTGATTATCGACATTAACACCGGTGCGCTGAAACCGCTGTATCTGGACGAAGACTGGAGCCATCCGCAATT  
 TGAGAAGTAA

AAGCTT-5`

**StrepTag-SspCA**

3`-CATATG

TGGAGCCACCCGCAATTTGAAAAGGAGCATGAGTGGAGCTACGAAGGCGAGAAAGGCCCGGAGCATTGGGCGCAA  
 CTGAAGCCGGAGTTTTTCTGGTGCAAACCTGAAGAACCAGAGCCCGATCAACATTGACAAGAAATACAAGGTGAAA  
 GCGAACCTGCCGAACTGAACCTGTACTATAAGACCGCGAAAGAGAGCGAAGTGTTAACAACGGCCACACCATC  
 CAAATTAACATCAAAGAGGACAACACCCTGAACTACCTGGGTGAAAAATATCAGCTGAAGCAATTCCACTTTCAC  
 ACCCCGAGCGAGCACACCATTGAAAAGAAAAGCTATCCGCTGGAGATCCACTTCGTGCACAAAACCGAAGACGGC  
 AAGATTCTGGTGGTTGGCGTTATGGCGAAGCTGGGTAAAAACCAACAAGGAGCTGGATAAAATTCTGAACGTGGCG  
 CCGGCGGAGGAAGGCGAAAAAATTCTGGACAAGAACCTGAACCTGAACAACCTGATCCCGAAGGATAAACGTTAC  
 ATGACCTATAGCGGCAGCCTGACCACCCCGCGTGCACCGAGGGTGTGCGTTGGATTGTTCTGAAGAAACCGATT  
 AGCATCAGCAAGCAGCAACTGGAAGAGCTGAAAAGCGTGATGGTTAACCCGAACAACCGTCCGGTTCAGGAGATT  
 AATAGCCGTTGGATCATCGAAGGTTTCTAA

AAGCTT-5`

**5. Calculated Hydratase Activities for Thermostability Experiments**



**Table S1.** Calculated hydratase activities at 25 °C for AwCA and PmCA after preincubation for thermostability determination in turnover rate per mg enzyme and WAU per mg enzyme.

| Temperature | Incubation Time | AwCA                                                        |                                                                         |                         | PmCA                                                        |                                                                         |                         |
|-------------|-----------------|-------------------------------------------------------------|-------------------------------------------------------------------------|-------------------------|-------------------------------------------------------------|-------------------------------------------------------------------------|-------------------------|
|             |                 | Total turnover rate<br>$\mu\text{mol s}^{-1} \text{L}^{-1}$ | Turnover rate per<br>mg enzyme<br>$\mu\text{mol s}^{-1} \text{mg}^{-1}$ | WAU<br>per mg<br>enzyme | Total turnover rate<br>$\mu\text{mol s}^{-1} \text{L}^{-1}$ | Turnover rate per<br>mg enzyme<br>$\mu\text{mol s}^{-1} \text{mg}^{-1}$ | WAU<br>per mg<br>enzyme |
| 30 °C       | 96 h            | 1417 ± 37                                                   | 2580 ± 75                                                               | 1400 ± 165              | 1552 ± 59                                                   | 3123 ± 120                                                              | 2079 ± 327              |
|             | 120 h           | 1408 ± 63                                                   | 2349 ± 137                                                              | 1368 ± 279              | 1530 ± 36                                                   | 2837 ± 90                                                               | 1956 ± 190              |
|             | 144 h           | 1414 ± 40                                                   | 2520 ± 99                                                               | 1388 ± 185              | 1548 ± 32                                                   | 3057 ± 86                                                               | 2052 ± 175              |
| 40 °C       | 96 h            | 1289 ± 42                                                   | 2068 ± 86                                                               | 873 ± 160               | 1574 ± 11                                                   | 3211 ± 26                                                               | 2193 ± 58               |
|             | 120 h           | 1222 ± 35                                                   | 1606 ± 89                                                               | 640 ± 118               | 1495 ± 41                                                   | 2695 ± 99                                                               | 1774 ± 208              |
|             | 144 h           | 1199 ± 44                                                   | 1662 ± 105                                                              | 567 ± 136               | 1540 ± 8                                                    | 3024 ± 60                                                               | 2005 ± 44               |
| 50 °C       | 24 h            | 1262 ± 31                                                   | 1944 ± 66                                                               | 775 ± 111               | 1485 ± 25                                                   | 2833 ± 55                                                               | 1721 ± 124              |
|             | 48 h            | 1090 ± 22                                                   | 1115 ± 54                                                               | 258 ± 53                | 1501 ± 31                                                   | 2757 ± 64                                                               | 1804 ± 156              |
|             | 72 h            | 888 ± 28                                                    | 489 ± 64                                                                | −105 ± 34               | 1480 ± 12                                                   | 2859 ± 40                                                               | 1700 ± 60               |
| 60 °C       | 96 h            | 868 ± 3                                                     | 387 ± 17                                                                | −128 ± 3                | 1507 ± 8                                                    | 2942 ± 23                                                               | 1833 ± 42               |
|             | 120 h           | 833 ± 26                                                    | 47 ± 75                                                                 | −159 ± 20               | 1474 ± 28                                                   | 2610 ± 78                                                               | 1667 ± 138              |
|             | 144 h           | 813 ± 10                                                    | 116 ± 61                                                                | −175 ± 6                | 1502 ± 9                                                    | 2874 ± 60                                                               | 1810 ± 45               |
| 70 °C       | 24 h            | 1116 ± 55                                                   | 1204 ± 110                                                              | 328 ± 138               | 1532 ± 28                                                   | 2868 ± 59                                                               | 1964 ± 149              |
|             | 48 h            | 790 ± 24                                                    | −202 ± 64                                                               | −188 ± 12               | 1490 ± 12                                                   | 2598 ± 49                                                               | 1746 ± 62               |
|             | 72 h            | n. a.                                                       | n. a.                                                                   | n. a.                   | 1436 ± 9                                                    | 2757 ± 20                                                               | 1487 ± 41               |
| 80 °C       | 96 h            | n. a.                                                       | n. a.                                                                   | n. a.                   | 1396 ± 2                                                    | 2477 ± 35                                                               | 1307 ± 8                |
|             | 120 h           | n. a.                                                       | n. a.                                                                   | n. a.                   | 1524 ± 14                                                   | 2858 ± 37                                                               | 1921 ± 71               |
|             | 144 h           | n. a.                                                       | n. a.                                                                   | n. a.                   | 1445 ± 49                                                   | 2090 ± 105                                                              | 1532 ± 231              |
| 90 °C       | 24 h            | n. a.                                                       | n. a.                                                                   | n. a.                   | 1560 ± 33                                                   | 3153 ± 68                                                               | 2114 ± 182              |
|             | 48 h            | n. a.                                                       | n. a.                                                                   | n. a.                   | 1577 ± 17                                                   | 3030 ± 38                                                               | 2205 ± 96               |
|             | 72 h            | n. a.                                                       | n. a.                                                                   | n. a.                   | 1469 ± 10                                                   | 2629 ± 24                                                               | 1644 ± 51               |
| 100 °C      | 96 h            | n. a.                                                       | n. a.                                                                   | n. a.                   | 1477 ± 36                                                   | 2798 ± 79                                                               | 1684 ± 176              |
|             | 120 h           | n. a.                                                       | n. a.                                                                   | n. a.                   | 1436 ± 10                                                   | 2461 ± 57                                                               | 1488 ± 45               |
|             | 144 h           | n. a.                                                       | n. a.                                                                   | n. a.                   | 1418 ± 26                                                   | 2535 ± 77                                                               | 1403 ± 117              |
| 110 °C      | 24 h            | n. a.                                                       | n. a.                                                                   | n. a.                   | 1400 ± 27                                                   | 2486 ± 61                                                               | 1326 ± 119              |
|             | 48 h            | n. a.                                                       | n. a.                                                                   | n. a.                   | 1377 ± 33                                                   | 2195 ± 69                                                               | 1225 ± 140              |
|             | 72 h            | n. a.                                                       | n. a.                                                                   | n. a.                   | 1413 ± 29                                                   | 2512 ± 59                                                               | 1385 ± 130              |
| 120 °C      | 96 h            | n. a.                                                       | n. a.                                                                   | n. a.                   | 1066 ± 18                                                   | 979 ± 65                                                                | 200 ± 41                |
|             | 120 h           | n. a.                                                       | n. a.                                                                   | n. a.                   | 1148 ± 37                                                   | 1451 ± 79                                                               | 412 ± 104               |
|             | 144 h           | n. a.                                                       | n. a.                                                                   | n. a.                   |                                                             |                                                                         |                         |
